# Supplementary material for: Unravelling Vaccine Scepticism in South Tyrol, Italy: A Qualitative Analysis of Personal, Relational, and Structural Factors Influencing Vaccination Decisions
Source: MDPI journal article supplement (doi:10.3390/healthcare11131908), 2023-07-01
Supplement: s1 [file s1]

Table S1. Consolidated criteria for reporting qualitative studies (COREQ)

| No                                             | Item                                     | Guide questions/description                                                                                                                                     | Description/response                                                                                                                                                                |
|------------------------------------------------|------------------------------------------|-----------------------------------------------------------------------------------------------------------------------------------------------------------------|-------------------------------------------------------------------------------------------------------------------------------------------------------------------------------------|
| <b>Domain 1: Research team and reflexivity</b> |                                          |                                                                                                                                                                 |                                                                                                                                                                                     |
| <i>Personal Characteristics</i>                |                                          |                                                                                                                                                                 |                                                                                                                                                                                     |
| 1.                                             | Interviewer/facilitator                  | Which author/s conducted the interview or focus group?                                                                                                          | Koler P, Tauber S, Psai V.                                                                                                                                                          |
| 2.                                             | Credentials                              | What were the researcher's credentials? <i>E.g. PhD, MD</i>                                                                                                     | PhD (PK), MSc (ST), MSc (VP).                                                                                                                                                       |
| 3.                                             | Occupation                               | What was their occupation at the time of the study?                                                                                                             | Director "Forum Prevention" Psychologist, (PK), Psychologist (ST), Psychologist (VP).                                                                                               |
| 4.                                             | Gender                                   | Was the researcher male or female?                                                                                                                              | Male (PK), Female (ST, VP).                                                                                                                                                         |
| 5.                                             | Experience and training                  | What experience or training did the researcher have?                                                                                                            | Training in motivational interviewing and university background in psychology.                                                                                                      |
| <i>Relationship with participants</i>          |                                          |                                                                                                                                                                 |                                                                                                                                                                                     |
| 6.                                             | Relationship established                 | Was a relationship established prior to study commencement?                                                                                                     | No.                                                                                                                                                                                 |
| 7.                                             | Participant knowledge of the interviewer | What did the participants know about the researcher? <i>e.g. personal goals, reasons for doing the research</i>                                                 | They knew it was a commissioned study and were informed about the aims by the information sheet. The researcher had a neutral position on attitudes and this was also communicated. |
| 8.                                             | Interviewer characteristics              | What characteristics were reported about the interviewer/facilitator? <i>e.g. Bias, assumptions, reasons and interests in the research topic</i>                | Profession, impartiality, reasons for the researcher's participation.                                                                                                               |
| <b>Domain 2: study design</b>                  |                                          |                                                                                                                                                                 |                                                                                                                                                                                     |
| <i>Theoretical framework</i>                   |                                          |                                                                                                                                                                 |                                                                                                                                                                                     |
| 9.                                             | Methodological orientation and Theory    | What methodological orientation was stated to underpin the study? <i>e.g. grounded theory, discourse analysis, ethnography, phenomenology, content analysis</i> | Grounded theory                                                                                                                                                                     |
| <i>Participant selection</i>                   |                                          |                                                                                                                                                                 |                                                                                                                                                                                     |
| 10.                                            | Sampling                                 | How were participants selected? <i>e.g. purposive, convenience, consecutive, snowball</i>                                                                       | Purposive sampling.                                                                                                                                                                 |
| 11.                                            | Method of approach                       | How were participants approached? <i>e.g. face-to-face, telephone, mail, email</i>                                                                              | Telephone, email.                                                                                                                                                                   |
| 12.                                            | Sample size                              | How many participants were in the study?                                                                                                                        | Ten.                                                                                                                                                                                |
| 13.                                            | Non-participation                        | How many people refused to participate or dropped out? Reasons?                                                                                                 | Ten. Reasons: willing to do interview only by phone, feel not to be taken seriously, lack of time, feel not to belong to the target group, ill, later refusal.                      |
| <i>Setting</i>                                 |                                          |                                                                                                                                                                 |                                                                                                                                                                                     |
| 14.                                            | Setting of data collection               | Where was the data collected? <i>e.g. home, clinic, workplace</i>                                                                                               | In the offices at the Forum Prävention, at the persons' homes or at places the persons otherwise indicated, such as the youth centre.                                               |

|                                        |                                |                                                                                                                                          |                                                                                                                                                                                                                                                                                                                                                                                                                                                                                                                                                                                                                                                   |
|----------------------------------------|--------------------------------|------------------------------------------------------------------------------------------------------------------------------------------|---------------------------------------------------------------------------------------------------------------------------------------------------------------------------------------------------------------------------------------------------------------------------------------------------------------------------------------------------------------------------------------------------------------------------------------------------------------------------------------------------------------------------------------------------------------------------------------------------------------------------------------------------|
| 15.                                    | Presence of non-participants   | Was anyone else present besides the participants and researchers?                                                                        | No.                                                                                                                                                                                                                                                                                                                                                                                                                                                                                                                                                                                                                                               |
| 16.                                    | Description of sample          | What are the important characteristics of the sample? <i>e.g. demographic data, date</i>                                                 | Seven interview partners were female (70%) and three were male (30%). On average, the persons were 42.5 (range 37-52) years. All interview partners had children. On average, the interviewees had 2.5 children (range = 1-5); they were between 3 months and 21 years old at the time of the interview. Two (20%) interviews were conducted in Italian and eight (80%) in German. Eight (80%) interview partners were assigned to a rural area and two (20%) to an urban area of South Tyrol. Six of the interview participants had a university degree (60%), three attended secondary school (30%), and one completed an apprenticeship (10%). |
| <i>Data collection</i>                 |                                |                                                                                                                                          |                                                                                                                                                                                                                                                                                                                                                                                                                                                                                                                                                                                                                                                   |
| 17.                                    | Interview guide                | Were questions, prompts, guides provided by the authors? Was it pilot tested?                                                            | There was a question guide that was tested with one person.                                                                                                                                                                                                                                                                                                                                                                                                                                                                                                                                                                                       |
| 18.                                    | Repeat interviews              | Were repeat interviews carried out? If yes, how many?                                                                                    | No.                                                                                                                                                                                                                                                                                                                                                                                                                                                                                                                                                                                                                                               |
| 19.                                    | Audio/visual recording         | Did the research use audio or visual recording to collect the data?                                                                      | Audio recording.                                                                                                                                                                                                                                                                                                                                                                                                                                                                                                                                                                                                                                  |
| 20.                                    | Field notes                    | Were field notes made during and/or after the interview or focus group?                                                                  | No.                                                                                                                                                                                                                                                                                                                                                                                                                                                                                                                                                                                                                                               |
| 21.                                    | Duration                       | What was the duration of the interviews or focus group?                                                                                  | Duration of 40 min to 90 min.                                                                                                                                                                                                                                                                                                                                                                                                                                                                                                                                                                                                                     |
| 22.                                    | Data saturation                | Was data saturation discussed?                                                                                                           | For an initial assessment in terms of grounded theory: yes.                                                                                                                                                                                                                                                                                                                                                                                                                                                                                                                                                                                       |
| 23.                                    | Transcripts returned           | Were transcripts returned to participants for comment and/or correction?                                                                 | No.                                                                                                                                                                                                                                                                                                                                                                                                                                                                                                                                                                                                                                               |
| <b>Domain 3: analysis and findings</b> |                                |                                                                                                                                          |                                                                                                                                                                                                                                                                                                                                                                                                                                                                                                                                                                                                                                                   |
| <i>Data analysis</i>                   |                                |                                                                                                                                          |                                                                                                                                                                                                                                                                                                                                                                                                                                                                                                                                                                                                                                                   |
| 24.                                    | Number of data coders          | How many data coders coded the data?                                                                                                     | Three.                                                                                                                                                                                                                                                                                                                                                                                                                                                                                                                                                                                                                                            |
| 25.                                    | Description of the coding tree | Did authors provide a description of the coding tree?                                                                                    | Yes, in the detailed research report.                                                                                                                                                                                                                                                                                                                                                                                                                                                                                                                                                                                                             |
| 26.                                    | Derivation of themes           | Were themes identified in advance or derived from the data?                                                                              | Only from the collected data.                                                                                                                                                                                                                                                                                                                                                                                                                                                                                                                                                                                                                     |
| 27.                                    | Software                       | What software, if applicable, was used to manage the data?                                                                               | Maxqda.                                                                                                                                                                                                                                                                                                                                                                                                                                                                                                                                                                                                                                           |
| 28.                                    | Participant checking           | Did participants provide feedback on the findings?                                                                                       | No.                                                                                                                                                                                                                                                                                                                                                                                                                                                                                                                                                                                                                                               |
| <i>Reporting</i>                       |                                |                                                                                                                                          |                                                                                                                                                                                                                                                                                                                                                                                                                                                                                                                                                                                                                                                   |
| 29.                                    | Quotations presented           | Were participant quotations presented to illustrate the themes / findings? Was each quotation identified? <i>e.g. participant number</i> | Yes.                                                                                                                                                                                                                                                                                                                                                                                                                                                                                                                                                                                                                                              |
| 30.                                    | Data and findings consistent   | Was there consistency between the data presented and the findings?                                                                       | Yes.                                                                                                                                                                                                                                                                                                                                                                                                                                                                                                                                                                                                                                              |
| 31.                                    | Clarity of major themes        | Were major themes clearly presented in the findings?                                                                                     | Yes.                                                                                                                                                                                                                                                                                                                                                                                                                                                                                                                                                                                                                                              |

---

|     |                         |                                                                        |      |
|-----|-------------------------|------------------------------------------------------------------------|------|
| 32. | Clarity of minor themes | Is there a description of diverse cases or discussion of minor themes? | Yes. |
|-----|-------------------------|------------------------------------------------------------------------|------|

---

Tong A, Sainsbury P, Craig J. Consolidated criteria for reporting qualitative research (COREQ): a 32-item checklist for interviews and focus groups. *Int J Qual Health Care*. 2007 Dec;**19**(6):349–57. doi: 10.1093/intqhc/mzm042.
